# Supplementary material
Source: ML conference proceedings conference paper supplement (https://openreview.net/forum?id=YOGss3XXp0)
Supplement: supplementary_material [file attachment]

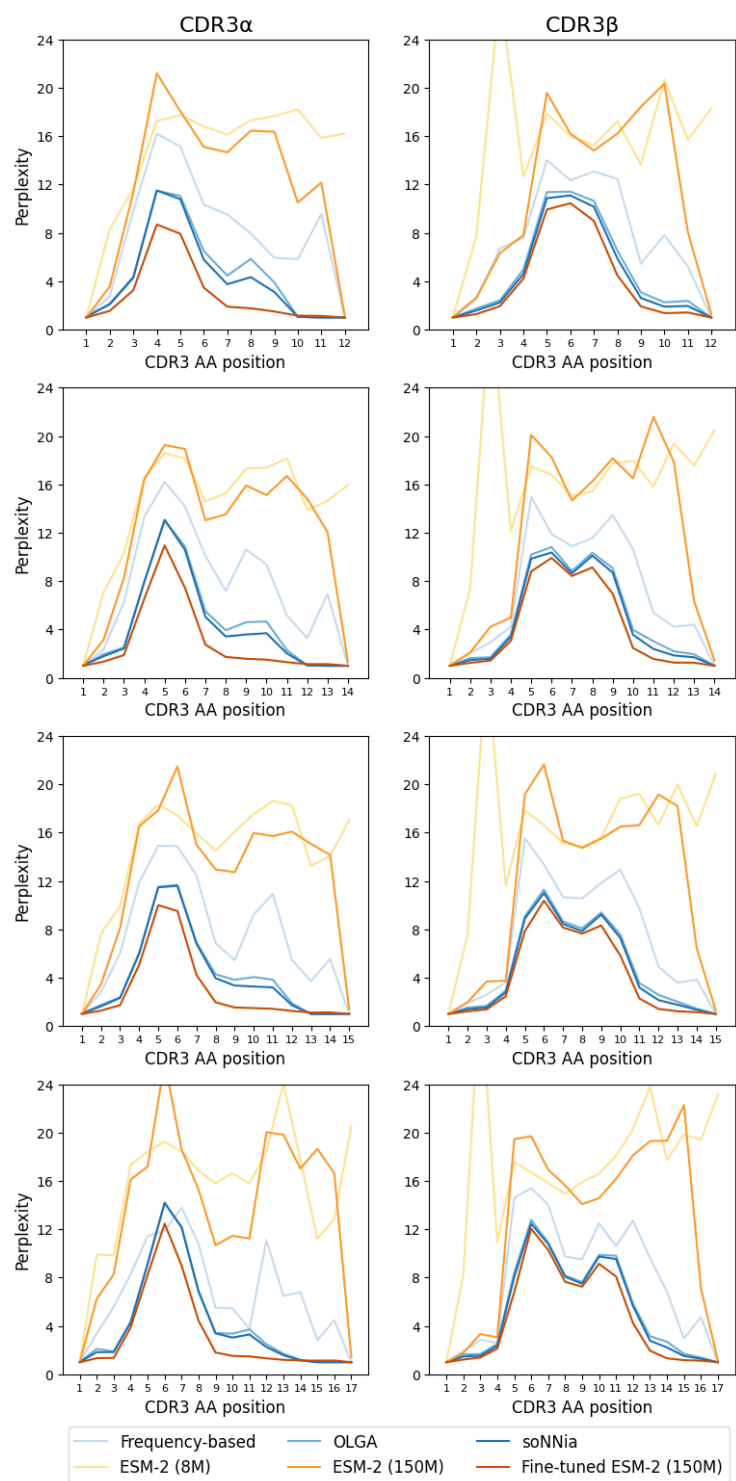

Supplementary Figure 1: The geometric mean perplexity of amino acids within the CDR3, for CDR3s of length 12, 14, 15, and 17.
